# Supplementary material
Source: publisher figshare collection journal article supplement (https://brill.figshare.com/ndownloader/files/32632841)
Supplement: Supplementary file 1 [file 32632841]

**Supplementary Table S2.** Morphometrics of males of *Ransomnema* species described to date.

|  | Species | n  (Holotype, paratype(s)) | L (mm) | a | b | c | Max. diam. | Pharynx | Tail | Stoma | Head to cloacal aperture | Left spicule  (mid-line) | Right spicule  (mid-line) | Ventral sucker (diam. or longer axis) | Ventral sucker from anus | Host | Distribution |
| --- | --- | --- | --- | --- | --- | --- | --- | --- | --- | --- | --- | --- | --- | --- | --- | --- | --- |
| *R. alatum* Hunt, 1994 | | 10 | 1.61 ± 0.07  (1.54-1.73) | 11.3  (10.0-13.6) | 4.2  (3.9-4.6) | 13.8  (12.1-18.6) | 143 ± 17  (114-172) | 382 ± 17  (361-413) | 117 ± 15  (83-140) | – | – | 82 ± 6.5  (72 -89) | 150 ± 14.5  (125-171) | – | – | ? *Polyconoceras* sp. | Bubia ARC, Lae, Morobe Province, Papua New Guinea. |
| *R artigasi* Coy Otero, García & Alvarez, 1993 (original) | | Holotype 1  (4 paratypes ) | 1.60  (1.58-1.90) | 8.88  (10.55-12.15)a | – | 10.46  (9.31-9.69) | 180  (130-180) | 383  (383-475) | 153  (163-204) | 51  (44-51) | – | 92  (78-98) | 227  (204-227) | – | 275  (275-348) | *Rhinocricus davernoyi* Karsch, 1881 | Loma El Salón, Sierra del Rosario, Provincia de Pinar del Río, Cuba |
| *R. bravoae* Sánchez-Velázquez, 1981 | |  | 1.938-2.160 | 12.20-14.57a | – | 6.66-6.86a | 133-177 | 0.368-0.421a | 291-315 | 0.032-0.041 | – | 98-102 | 381-459 | – | – | *Hiltonius carpinus* (Chamberlain); posterior intestine | Cerro del Tepozteco, Tepztlán, Morelos, Mexico |
| *R. bravoae* Sánchez-Velázquez, 1981 (neoallotype, plus paratypes) | | 11 | 2.1 ± 0.126  (1.9-2.2) | 14.3 ± 1.9  (11-17.3) | 5 ± 0.3  (4.2-5.2) | 7 ± 0.3  (6.4-7.50) | 145 ± 22  (118-194) | 432 ± 27  (390-478.6) | 291 ± 28.4  (251-341) | 53 ± 7.6  (40.0-64.7) | 1.745 ± 115  (1.537-1.917) | 123 ± 21  (94-165) | 416 ± 36  (353-476) | 71 ± 13  (47-94) | – | *Anadenobolus putealis* Loomis,1969 (type host) | Biosphere Reserve of Los Tuxtlas, Mexico (type locality) |
| *R. bursatum* Spiridonov, 1989 | | 10 | 1.98  (1.959 (1.850-2.060)) | 3.2  (5.2 (13.2-18.5)) | 4.1  (3.9 (3.7-4.5)) | 12.0  (9.0 (9.9-16.8)) | – | – | – | – | – | 70-105 | 135-220 | 60 | – | *Rhinocricus* sp. | Guantanamo Province, Cuba |
| *R. bursatum* Spiridonov, 1989 (additional data from Hunt, 1994) | | 5 | 2.09 ± 0.23  (1.86-2.42) | 15.5  (15.1-16.1) | 4.2  (4.0-4.5) | 12.6  (11.8-14.1) | 135 ± 12  (120-150) | 501 ± 40  (449-536) | 166 ± 9  (156-176) | – | – | 105 ± 8  (98-117) | 188 ± 25  (153-218) | – | – | *Rhinocricus* sp. | Topotype material |
| *R. christiei* Dollfus, 1952 (original description) | | 1 | 1.52 | 17.88a | – | 12.16a | 85 | 230 | 125 | – | – | 90 | 220 | 32 (longitudinal) | 182 | *Rhinocricus cachoeirensis* O. Schubart | São Paulo State, Brazil |
| *R. christiei* Dollfus, 1952 [Redescription; Adamson 1983 p.123] | | 7 | 1.56-1.71 | 14.25-16.08 | – | 9.88-10.39 | 97-120 | 356-398 | 151-173 | 27-35 | 1.41-1.54 | 77-98a | 205-209a | 44-52 | 202-228 | *Rhinocricus cachoeirensis* | São Paulo State, Brazil |
| *R. communis* (d'Udekem, 1859) Artigas, 1930 [Measurements; Travassos & Kloss, 1965, p. 69-71] | | ? | 1.953-2.111 | 16.36-22.71 | – | 9.39-9.64 | 86-129 | 369-395 | 208-219 | ≈ 40 | – | 76-100 | 276-296 | 40-52 | 392-408 | Posterior intestine of *Rhinocricus electrofasciatns* Schubart (tipos) and *R. nodulipes* Schubart, Diplopoda | Cachimbo, Pará State (types), and Urucum, Matô Grosso State, Brazil |
| *R. communis* Travassos & Kloss, 1965 [Redescription; Adamson 1983 p.123 from paratypes] | | 2 paratypes | 1.40-1.51 | 22.95-23.23 | – | 11.53-11.76 | 61-65 | 304-317 | 119-131 | 33-34 | 1.281-1.379 | 65-66 | 241-256 | 35-36 | 314-329 | *Rhinocricus electrofasciatus* Schubart (only reported this one) | Pará State, Brazil. |
| *R. habanensis* Coy Otero,García & Alvarez, 1993 | | Holotype  4 paratypes | 1.79  (1.56-1.82) | 11.62  (10.91-11.67) | – | 9.08  (9.17-9.24) | 154  (143-156) | 419  (411-465) | 197  (170-197) | 41  (37-51) | – | 78  (78-91) | 163  (163-187) | – | 435  (377-435) | *Rhinocricus davernoyi* Karsch, 1881 | Bosque del Río Ariguanabo, San Antoio de los Baños, Provincia de La Habana, Cuba |
| *R. longispiculum* Artigas, 1926 [Measurements; Travassos & Kloss, 1965, p. 68-69] | | ? | 1.39-1.72 | 14.96-17.86a | – | 9.83-13.39a | 78-115 | 256-306 | 104-175 | 23-40 | – | 60-100 | 377-520 | 34-48 | 250-315 | Posterior intestine of *Rhinocricus* sp. and *R.* *padbergi* Verhoeff, (Diplopoda). | Angra dos Reis, Rio de Janeiro State; Presidente Epitácio, São Paulo State; Jacarepaguá and Manguinhos, Guanabara State, Brazil |
| *R. longispiculum* Artigas, 1926 [Redescription; Adamson 1983 p.119] | | 7 | 1.6-1.95 | 15.73-16.67 | – | – | 96-124 | 388-437 | 182-210 | 40-52 | – | 78-90 | 461-514 | 53-57 (diam.) | 200-246 | *Rhinocricus* (=*Anadenobolus padbergi* (Verhoeff, 1938),probably *padbergi* Schubart) | São Paulo State, Brazil. Nematodes stored in the parasite collection of the National Museum of Natural History in Paris (Zoologie-Vers: 32 RA). |
| *R. longispiculum* Artigas, 1926 Original description | | 2 | 1.54,1.54 | 14.39, 16.74 | – | 13.39, 16.74a | 107, 92 | 279, 306 | 115, 92 | 46, 45 | 1.425, 1.448a | 84, 69 | 415, 377 | 169,161 | – | Intestine of myriapod (Julid). | Rio Angra dos Reis State, Brazil. |
| *R. macrocephalus* (d'Udekem, 1859) Artigas, 1930c | | 1 | ≈ 1.00b | – | – | – | – | – | – | – | – | – | – | – | – | *Julus terrestris* L. | Probably South America, regardless of Dollfus' claim of 1959 |
| *R. moa* García, 1997 | | Holotype  (2 paratypes) | 1.794  (0.924-1.794) | 14.24  (7.33-10.68) | – | 11.43  (6.79-11.43) | 126  (126-168) | 315  (315-357) | 157  (136-157) | – | – | 165 | 187 | – | 220 | *Rhinocricus suprenans* (Diplopoda: Spirobolida) | Meseta de El Toldo, Moa, provincia de Holguín, Cuba |
| *R. paraguayense* Adamson, 1985:882-885. | | 1 | 2.28 | 18.38a | – | 11.87 | 124 | 434 | 192 | 48 | 2.08 | 106 | 263 | – | 320 | *Rhinocricus bernardinensis* (Diplopoda) | Iguassu Falls, Paraguay |
| *R. ransomi* Artigas, 1926 [Measurements; Travassos & Kloss, 1965, p. 67- 68] named neotypes from this material. | | ? | 1.378 - 1.52 | 16.21-13.82 | – | 9.87  (11.58-9.87)a | 85-110 | 306-384 | 119-154 | 36-53 | – | 69-90 | 130-220 | 26-32 | 115- 182 | *Rhinocricus* *cachoeirensis* Schubart and *R*. *punctatosfasciatus* Schubart (Diplopoda). | São Paulo State, Remédios e Presidente Epitácio; São Luiz de Cáceres, Mato Grosso, Brazil. |
| *R. ransomi* Artigas, 1926 Type species | | 1 | 1.5 | 13.64 | – | 9.74 | 110 | 384 | 154 | 38 | – | 69 | 130 | 26 | – | Intestine of myriapod (Julid). | Remedios,São Paulo State, Brazil. |

a Calculated from original measurements.

b A bit smaller than the female, but had the same shape.

c Drawings had no scale.
